# Supplementary material
Source: ML conference proceedings conference paper supplement (https://proceedings.neurips.cc/paper_files/paper/2022/hash/98a5c0470e57d518ade4e56c6ee0b363-Abstract.html)
Supplement: Supplementary file 1 [file 98a5c0470e57d518ade4e56c6ee0b363-Supplemental-Conference.zip]

Archive with 2 entries (2 files):
- appendix_camera_ready_with_appendix.pdf
- __MACOSX/._appendix_camera_ready_with_appendix.pdf
